# Supplementary material
Source: publisher figshare collection journal article supplement (https://sage.figshare.com/ndownloader/files/16861937)
Supplement: Supplementary file 1 [file 16861937]

## Sheet: SM1
Supplementary Table 1. Canine mast cell tumor (MCT) sample registration details and the DNA washing requirements for successful PCR amplification using KIT and HPRT gene primers.
Sample-ID	Laboratory source	Age of block (y)	MCT type	Patnaik grade	Kiupel grade	KIT mutation	Washes required for successful KIT PCR	Washes required for successful HPRT PCR	DNA concentration (ng/µL) - no wash	DNA concentration (ng/µL) - one wash	DNA concentration (ng/µL) - two washes	A260/280 - no wash	A260/280 - one wash	A260/280 - two washes	A260/230 - no wash	A260/230 - one wash	A260/230 - two washes
A1	Gribbles-Glenside	1	Cutaneous	2	Low	No	None	None	97.8			1.29			2.56
A3	Gribbles-Glenside	1	Cutaneous	2	Low	No	None	None	51.1			1.84			2.62
A4	Gribbles-Glenside	1	Cutaneous	1	Low	No	None	None	69.3			1.89			1.81
A6	Gribbles-Glenside	1	Cutaneous	2	Low	No	One wash	None	24.34	11.16		2	1.64		0.79	0.74
A8	Gribbles-Glenside	1	Cutaneous	2	Low	No	None	None	165.6			1.81			1.44
A9	Gribbles-Glenside	1	Cutaneous	3	High	Exon 11 ITD	None	None	245.69			1.94			2.33
A10	Gribbles-Glenside	1	Cutaneous	3	High	Exon 11 ITD	None	None	163.25			2			2.4
A11	Gribbles-Glenside	1	Cutaneous	3	High	Exon 11 ITD	None	None	12.99			1.25			1.71
A12	Gribbles-Glenside	1	Cutaneous	2	Low	No	None	None	21.97			1.66			1.34
A13	Gribbles-Glenside	1	Cutaneous	2	Low	No	One wash	None	30.27	9.07		1.73	1.64		1.19	0.62
A14	Gribbles-Glenside	1	Subcutaneous	NA	NA	No	None	None	71.68			1.88			1.53
A16	Gribbles-Glenside	1	Subcutaneous	NA	NA	No	None	None	43.4			2.01			2.36
A20	Gribbles-Glenside	1	Cutaneous	2	High	Exon 11 ITD	None	None	446.42			1.91			2.17
A21	Gribbles-Glenside	1	Subcutaneous	NA	NA	No	None	None	54.22			2.05			2.26
A22	Gribbles-Glenside	1	Cutaneous	2	Low	No	None	None	25.56			2.04			2.36
A23	Gribbles-Glenside	1	Cutaneous	2	Low	No	None	None	96.47			1.96			2.24
A24	Gribbles-Glenside	1	Cutaneous	2	Low	No	None	None	107.29			1.98			2.38
A25	Gribbles-Glenside	1	Cutaneous	2	Low	No	None	None	20.22			2.34			1.63
A26	Gribbles-Glenside	1	Cutaneous	2	High	Exon 11 ITD	None	None	88.42			1.91			2.09
A28	Gribbles-Glenside	1	Cutaneous	2	Low	No	None	None	164.11			1.93			2.24
A29	Gribbles-Glenside	1	Cutaneous	2	Low	No	None	None	75.41			1.98			2.17
A30	Gribbles-Glenside	1	Cutaneous	2	Low	No	None	None	71.49			1.86			1.74
A31	Gribbles-Glenside	1	Cutaneous	2	Low	No	None	None	80.93			1.96			1.98
A32	Gribbles-Glenside	1	Cutaneous	2	Low	No	None	None	101.03			1.96			2.18
A33	Gribbles-Glenside	1	Cutaneous	3	High	No	None	None	118.31			1.96			2.04
A34	Gribbles-Glenside	1	Cutaneous	2	Low	No	None	None	106.51			1.94			2.26
A35	Gribbles-Glenside	1	Subcutaneous	NA	NA	No	None	None	46.73			1.9			1.84
A36	Gribbles-Glenside	1	Cutaneous	2	Low	No	None	None	42.28			1.87			1.77
A37	Gribbles-Glenside	1	Cutaneous	1	Low	No	None	None	23.56			1.93			2.3
A38	Gribbles-Glenside	1	Cutaneous	2	Low	No	None	None	28.92			1.84			1.96
A39	Gribbles-Glenside	1	Cutaneous	2	Low	No	None	None	162.67			2.34			2.34
A40	Gribbles-Glenside	1	Cutaneous	3	High	Exon 11 ITD	Two washes	None	20.06	89.45	66.83	1.81	1.66	1.69	2.21	1.19	0.77
A44	Gribbles-Glenside	1	Subcutaneous	NA	NA	No	None	None	11.41			1.67			1.73
A45	Gribbles-Glenside	1	Cutaneous	1	Low	No	None	None	22.39			1.74			0.9
A47	Gribbles-Glenside	1	Subcutaneous	NA	NA	No	None	None	95.41			1.95			2.43
A48	Gribbles-Glenside	1	Cutaneous	2	Low	No	None	None	52.62			1.97			1.67
A49	Gribbles-Glenside	1	Cutaneous	2	Low	No	None	None	121.62			1.91			2.31
A50	Gribbles-Glenside	1	Cutaneous	3	High	No	None	None	101.05			1.85			1.71
A51	Gribbles-Glenside	1	Subcutaneous	NA	NA	No	None	None	28.47			1.98			2.19
A52	Gribbles-Glenside	1	Cutaneous	2	High	No	None	None	122.97			1.88			2.42
A54	Gribbles-Glenside	1	Cutaneous	2	High	No	None	None	291.35			1.87			2.21
A55	Gribbles-Glenside	1	Cutaneous	1	Low	No	None	None	26.21			1.97			1.61
A56	Gribbles-Glenside	0	Cutaneous	2	Low	No	None	None	34.51			1.9			2.12
A57	Gribbles-Glenside	0	Cutaneous	2	Low	No	None	None	62.38			1.98			2.3
A58	Gribbles-Glenside	0	Subcutaneous	NA	NA	No	None	None	120.29			1.88			2.18
A59	Gribbles-Glenside	0	Cutaneous	2	Low	No	One wash	One wash	75.14	38.59		1.8	1.51		2.3	0.75
A60	Gribbles-Glenside	0	Cutaneous	2	Low	No	None	None	118.04			1.92			1.52
A61	Gribbles-Glenside	0	Subcutaneous	NA	NA	No	Two washes	None	72.41	28.21	5.55	1.72	1.4	1.51	1.72	0.86	0.64
A63	Gribbles-Glenside	0	Cutaneous	2	Low	No	None	None	169.68			1.91			1.96
A64	Gribbles-Glenside	0	Cutaneous	2	Low	No	None	None	107.05			1.92			1.55
A65	Gribbles-Glenside	0	Subcutaneous	NA	NA	No	None	None	108.77			1.93			1.89
A66	Gribbles-Glenside	0	Cutaneous	1	Low	No	None	None	65.32			1.97			0.86
A67	Gribbles-Glenside	0	Cutaneous	2	Low	No	None	None	30.07			1.83			1.77
A68	Gribbles-Glenside	0	Cutaneous	2	Low	No	None	None	84.93			1.93			2.53
A69	Gribbles-Glenside	0	Cutaneous	2	Low	No	One wash	One wash	364.74	138.13		1.9	1.76		2.43	1.61
A70	Gribbles-Glenside	0	Cutaneous	2	Low	No	None	None	103.57			1.98			1.88
A71	Gribbles-Glenside	0	Cutaneous	2	Low	No	One wash	One wash	104.97	68.44		1.86	1.78		1.84	1.39
A72	Gribbles-Glenside	0	Cutaneous	3	High	No	None	None	359.76			1.92			2.66
A73	Gribbles-Glenside	0	Cutaneous	2	Low	No	None	None	26.02			1.89			1.54
A74	Gribbles-Glenside	0	Cutaneous	2	Low	No	None	None	33.6			2.01			1.94
A75	Gribbles-Glenside	0	Cutaneous	3	High	Exon 11 ITD	None	None	41.79			2.01			2
A77	Gribbles-Glenside	0	Cutaneous	3	High	Exon 11 ITD	None	None	96.81			2.46			2.46
A78	Gribbles-Glenside	0	Cutaneous	2	Low	No	None	None	47.16			1.32			1.32
A79	Gribbles-Glenside	0	Cutaneous	3	High	Exon 11 ITD	None	None	395.07			2.23			2.23
A80	Gribbles-Glenside	0	Cutaneous	3	High	No	None	None	123.95			2.01			2.01
A82	Gribbles-Glenside	0	Cutaneous	2	Low	No	One wash	None	118.64	73.87		1.75	1.72		1.75	1.1
A83	Gribbles-Glenside	0	Cutaneous	2	Low	No	One wash	One wash	66.82	60.82		2.05	1.53		0.99	0.84
A84	Gribbles-Glenside	0	Cutaneous	2	Low	No	One wash	One wash	83.62	48.48		1.94	1.69		1.03	1.01
A85	Gribbles-Glenside	0	Cutaneous	2	Low	No	One wash	None	73.84	52.33		1.91	1.66		2.07	0.85
A86	Gribbles-Glenside	0	Cutaneous	2	Low	No	One wash	One wash	46.84	35.57		1.99	1.66		2.18	0.86
A88	Gribbles-Glenside	0	Cutaneous	2	Low	No	One wash	None	46.85	143.3		1.87	1.53		1.69	0.66
A91	Gribbles-Glenside	0	Cutaneous	3	High	Exon 11 ITD	None	None	246.3			1.89			1.96
A92	Gribbles-Glenside	0	Subcutaneous	NA	NA	No	One wash	One wash	46.78	40.34		1.89	1.5		1.78	0.67
A93	Gribbles-Glenside	0	Cutaneous	2	Low	Exon 11 ITD	None	None	4.45			1.08			2.81
A94	Gribbles-Glenside	0	Cutaneous	3	High	No	One wash	One wash	207.56	254.45		1.93	1.58		2.29	0.78
A95	Gribbles-Glenside	0	Subcutaneous	NA	NA	No	One wash	None	78.34	13		1.9	1.6		1.63	1.38
A96	Gribbles-Glenside	0	Cutaneous	3	High	No	Two washes	None	759.24	268.6	311.23	1.87	1.76	1.58	2.14	1.42	0.83
A98	Gribbles-Glenside	0	Cutaneous	2	Low	No	One wash	None	72.65	101.32		1.9	1.62		1.77	0.81
A99	Gribbles-Glenside	0	Cutaneous	2	Low	No	One wash	None	265.95	176.13		1.94	1.69		2.24	1.01
A100	Gribbles-Glenside	0	Cutaneous	2	Low	No	One wash	One wash	169.19	192.68		1.91	1.68		2.3	0.92
A102	Gribbles-Glenside	0	Cutaneous	2	Low	No	None	None	19.83			1.85			1.34
A103	Gribbles-Glenside	0	Cutaneous	3	High	No	None	None	345.71			1.91			2.35
A104	Gribbles-Glenside	0	Cutaneous	2	Low	No	None	None	52.56			1.96			1.98
A105	Gribbles-Glenside	0	Cutaneous	2	Low	No	None	None	38.9			2.07			1.97
A106	Gribbles-Glenside	0	Cutaneous	2	Low	No	One wash	One wash	152.1	139.53		1.93	1.67		2.23	0.91
A107	Gribbles-Glenside	0	Cutaneous	1	Low	No	One wash	One wash	38.45	262.13		2.01	1.43		2.17	0.69
A108	Gribbles-Glenside	0	Cutaneous	1	Low	No	None	None	15.35			1.76			1.1
A109	Gribbles-Glenside	0	Cutaneous	2	Low	No	One wash	One wash	122.21	61.39		1.88	1.85		2.47	1.85
A110	Gribbles-Glenside	0	Cutaneous	2	Low	Exon 11 ITD	One wash	One wash	39.73	39.77		1.63	1.51		1.58	0.67
M1	Gribbles-Clayton	2	Cutaneous	2	Low	No	None	None	38.68			2			1.63
M2	Gribbles-Clayton	2	Cutaneous	3	High	Exon 11 ITD	None	None	245.38			2.03			2.2
M4	Gribbles-Clayton	2	Cutaneous	2	Low	No	One wash	One wash	88.41	34.53		1.94	1.83		2.28	1.31
M5	Gribbles-Clayton	2	Cutaneous	2	High	No	One wash	None	314.62	99.23		1.97	1.88		2	1.88
M6	Gribbles-Clayton	2	Cutaneous	2	Low	No	None	None	42.43			2.06			1.71
M7	Gribbles-Clayton	2	Subcutaneous	NA	NA	No	One wash	None	282.01	92.76		1.96	1.93		2.07	2.24
M8	Gribbles-Clayton	1	Cutaneous	3	High	Exon 11 ITD	None	None	251.95			1.97			2.25
M9	Gribbles-Clayton	1	Cutaneous	3	High	No	One wash	None	206.72	61.55		1.95	1.83		2.36	1.51
M10	Gribbles-Clayton	1	Cutaneous	2	Low	No	None	None	9.09			1.67			2.12
M11	Gribbles-Clayton	1	Cutaneous	2	Low	No	One wash	None	62.27	14.48		2.06	1.63		2.27	1.68
M12	Gribbles-Clayton	1	Cutaneous	2	Low	No	None	None	12.71			2.5			2.22
M13	Gribbles-Clayton	1	Cutaneous	1	Low	No	One wash	One wash	5.62	1.66		1.5	1.57		1.89	0.35
M15	Gribbles-Clayton	1	Cutaneous	3	High	No	None	None	17.2			1.74			1.92
M16	Gribbles-Clayton	1	Cutaneous	2	Low	No	None	None	5.44			1.65			1.77
M18	Gribbles-Clayton	1	Cutaneous	2	Low	No	One wash	One wash	7.84	25.99		1.3	1.42		1.94	0.66
M19	Gribbles-Clayton	1	Cutaneous	2	Low	No	One wash	None	16.67	88.33		1.92	1.5		1.54	0.62
M20	Gribbles-Clayton	1	Subcutaneous	NA	NA	No	One wash	One wash	18.09	23.3		1.56	1.58		2.13	0.68
M21	Gribbles-Clayton	1	Cutaneous	2	Low	No	None	None	22.88			1.76			1.62
M22	Gribbles-Clayton	1	Cutaneous	2	Low	No	None	None	5.03			1.66			2.07
M23	Gribbles-Clayton	1	Cutaneous	2	Low	No	Two washes	Two washes	59.14	43.62	67.83	1.83	1.54	1.5	1.5	0.7	0.62
M24	Gribbles-Clayton	2	Cutaneous	3	High	No	None	None	73.79			2.03			1.49
M25	Gribbles-Clayton	2	Cutaneous	3	High	Exon 11 ITD	One wash	One wash	14.45	13.57		1.86	1.95		1.22	1.4
M26	Gribbles-Clayton	2	Cutaneous	3	High	Exon 11 ITD	None	None	14.01			2.08			1.28
M27	Gribbles-Clayton	2	Subcutaneous	NA	NA	No	One wash	None	8.52	22.03		1.71	1.5		0.89	0.7
M28	Gribbles-Clayton	2	Cutaneous	2	Low	No	None	None	8.66			1.97			0.42
M29	Gribbles-Clayton	1	Cutaneous	2	Low	Exon 11 ITD	One wash	None	40.33	41.92		2.32	1.63		1.41	0.75
M30	Gribbles-Clayton	1	Cutaneous	2	High	No	One wash	One wash	33.49	44.76		1.92	1.62		2.02	0.77
M31	Gribbles-Clayton	1	Subcutaneous	NA	NA	No	One wash	One wash	18.26	35.7		1.74	1.57		1.29	0.68
M32	Gribbles-Clayton	1	Cutaneous	2	Low	No	One wash	One wash	14.34	29.81		1.77	1.64		0.71	0.71
M33	Gribbles-Clayton	1	Cutaneous	2	Low	No	One wash	None	19	20.12		1.92	1.63		0.56	0.82
M34	Gribbles-Clayton	1	Cutaneous	2	Low	No	One wash	One wash	19.9	21.7		1.82	1.54		0.33	0.61
M35	Gribbles-Clayton	1	Cutaneous	2	Low	No	None	None	75.5			2.07			1.67
M36	Gribbles-Clayton	1	Cutaneous	2	Low	No	One wash	One wash	31.7	84.28		2.08	1.52		2.64	1.52
M37	Gribbles-Clayton	1	Cutaneous	3	High	Exon 11 ITD	None	None	186.48			1.88			1.66
M38	Gribbles-Clayton	1	Cutaneous	2	Low	No	None	None	66.32			2.03			2.27
M39	Gribbles-Clayton	1	Cutaneous	2	Low	No	None	None	107.57			2.01			1.43
M40	Gribbles-Clayton	1	Subcutaneous	NA	NA	No	One wash	One wash	295.17	168.23		1.95	1.92		2.13	1.92
M41	Gribbles-Clayton	1	Subcutaneous	NA	NA	No	One wash	None	199.74	140.82		1.94	1.87		2.22	1.87
M42	Gribbles-Clayton	1	Subcutaneous	NA	NA	No	One wash	One wash	143.59	93.85		1.97	1.86		1.67	1.86
M43	Gribbles-Clayton	1	Cutaneous	3	High	No	None	None	198.21			2.01			2.5
M44	Gribbles-Clayton	1	Cutaneous	2	Low	No	One wash	None	110.61	100.97		2.01	1.67		2.28	1.67
M45	Gribbles-Clayton	1	Cutaneous	3	High	No	None	None	193.96			1.98			2.19
M47	Gribbles-Clayton	1	Cutaneous	2	Low	No	None	None	26.24			1.62			1.7
M48	Gribbles-Clayton	1	Cutaneous	2	Low	No	One wash	None	127.88	26.69		1.59	1.84		0.85	1.06
M49	Gribbles-Clayton	1	Cutaneous	2	Low	No	None	None	16.77			1.61			1.67
M50	Gribbles-Clayton	1	Cutaneous	2	Low	No	None	None	21.02			2.11			0.93
M51	Gribbles-Clayton	1	Cutaneous	2	Low	No	None	None	40.38			2.01			0.85
M52	Gribbles-Clayton	1	Cutaneous	2	Low	No	One wash	One wash	201.36	172.58		1.94	1.77		2.21	1.28
M53	Gribbles-Clayton	0	Cutaneous	2	Low	No	One wash	One wash	63.7	47.73		1.94	1.67		1.09	0.87
M54	Gribbles-Clayton	0	Subcutaneous	NA	NA	No	One wash	One wash	62.6	81.88		2.08	1.94		1.42	1.8
M55	Gribbles-Clayton	0	Cutaneous	2	Low	No	One wash	One wash	120.95	33.79		1.95	1.95		1.69	1.73
M57	Gribbles-Clayton	0	Subcutaneous	NA	NA	No	One wash	None	104.36	31.26		1.95	1.99		1.66	1.78
M58	Gribbles-Clayton	0	Cutaneous	2	Low	No	One wash	None	188.11	68.38		1.97	1.86		1.87	1.54
M59	Gribbles-Clayton	0	Cutaneous	2	Low	No	One wash	One wash	36.33	7.34		1.81	1.66		2.39	0.81
M60	Gribbles-Clayton	0	Cutaneous	2	Low	No	One wash	One wash	50.34	32.33		1.96	1.69		1.92	0.76
M61	Gribbles-Clayton	0	Cutaneous	2	Low	No	One wash	One wash	75.56	28.17		1.88	1.82		0.96	1.09
M62	Gribbles-Clayton	0	Cutaneous	2	Low	No	Two washes	None	54	92.84	15.58	1.94	1.57	1.53	1.8	0.95	1.6
M63	Gribbles-Clayton	0	Cutaneous	2	Low	No	Two washes	Two washes	25.23	7.9	21.76	1.97	2.45	1.44	1.95	1.27	0.81
M64	Gribbles-Clayton	0	Subcutaneous	NA	NA	No	One wash	None	221.73	58.81		1.94	1.82		1.87	1.65
M65	Gribbles-Clayton	0	Cutaneous	2	Low	No	One wash	None	25.25	33.23		1.81	1.68		2	0.69
M66	Gribbles-Clayton	0	Cutaneous	2	Low	No	One wash	One wash	182.43	79.18		1.94	1.83		2.23	1.27
M68	Gribbles-Clayton	0	Cutaneous	2	Low	No	One wash	One wash	95.04	23.7		1.96	2.03		1.16	1.87
M69	Gribbles-Clayton	0	Cutaneous	2	Low	No	One wash	None	119.63	34.84		1.96	1.86		1.39	2.01
M70	Gribbles-Clayton	0	Cutaneous	2	Low	No	One wash	One wash	25.95	7.61		1.93	1.69		1.4	1.34
M72	Gribbles-Clayton	0	Cutaneous	2	High	Exon 11 ITD	One wash	One wash	106.54	30.52		1.99	1.62		1.94	0.73
M74	Gribbles-Clayton	0	Cutaneous	2	Low	No	One wash	One wash	56.4	12.64		2.07	1.91		1.08	1.69
M75	Gribbles-Clayton	1	Subcutaneous	NA	NA	No	One wash	None	231.19	143.05		2.01	1.8		2.21	1.2
M76	Gribbles-Clayton	1	Cutaneous	2	Low	No	None	None	31.36			1.89			1.33
M77	Gribbles-Clayton	1	Cutaneous	2	Low	No	One wash	One wash	9.04	11.99		1.3	1.98		2.79	1.72
M78	Gribbles-Clayton	1	Cutaneous	2	Low	No	One wash	None	58.62	19.6		1.79	1.93		1.2	0.99
M79	Gribbles-Clayton	1	Cutaneous	3	High	No	Two washes	Two washes	263.5	165.41	52.67	1.87	1.8	1.82	2.15	1.98	1.97
M80	Gribbles-Clayton	1	Cutaneous	2	Low	No	One wash	One wash	71.17	4.9		2.03	1.93		1.19	1.01
M81	Gribbles-Clayton	1	Subcutaneous	NA	NA	No	One wash	One wash	354.34	241.56		1.91	1.82		2.03	1.54
M82	Gribbles-Clayton	1	Subcutaneous	NA	NA	Exon 11 21-bp deletion	None	None	170.35			2.04			1.68
M83	Gribbles-Clayton	1	Cutaneous	2	Low	No	One wash	One wash	53.36	36.13		2.04	1.73		1.33	0.88
M84	Gribbles-Clayton	1	Cutaneous	2	Low	No	One wash	One wash	48.21	13.82		2.02	1.87		0.99	1.11
M85	Gribbles-Clayton	1	Cutaneous	2	Low	No	One wash	One wash	54.67	9.26		2.18	1.43		0.88	0.98
M86	Gribbles-Clayton	1	Cutaneous	2	Low	No	None	None	33.1			2.06			1.06
M87	Gribbles-Clayton	1	Cutaneous	3	High	Exon 11 ITD	One wash	None	56.51	97.53		1.99	1.67		0.98	0.77
M88	Gribbles-Clayton	1	Cutaneous	2	Low	No	One wash	One wash	51.33	14.5		2.01	2.22		1.75	1.06
M89	Gribbles-Clayton	1	Cutaneous	2	Low	No	One wash	None	27.96	10.7		1.81	2.14		0.95	0.78
M90	Gribbles-Clayton	1	Cutaneous	2	Low	No	One wash	One wash	104.83	107.64		1.97	1.68		1.71	0.79
M91	Gribbles-Clayton	1	Cutaneous	2	Low	No	One wash	One wash	137.09	136.38		1.98	1.71		2.01	1.01
M92	Gribbles-Clayton	1	Cutaneous	2	Low	No	One wash	One wash	39.67	48.91		2.1	1.63		1.18	0.55
M93	Gribbles-Clayton	1	Cutaneous	2	Low	No	One wash	One wash	36.56	14.34		1.83	2.81		1.59	2.12
M94	Gribbles-Clayton	1	Subcutaneous	NA	NA	No	One wash	One wash	102.49	46.63		2.1	1.87		1.4	1.04
M95	Gribbles-Clayton	1	Cutaneous	2	Low	No	One wash	None	26.81	10.5		2.06	2.77		1.44	1.47
M96	Gribbles-Clayton	1	Cutaneous	2	Low	No	One wash	One wash	66.54	45.63		1.94	1.89		1.81	1.05
M97	Gribbles-Clayton	1	Cutaneous	2	Low	No	None	None	100.23			2.02			2.33
M98	Gribbles-Clayton	1	Cutaneous	2	Low	No	One wash	None	43.21	26.83		2.02	1.9		2.08	1.74
M99	Gribbles-Clayton	1	Cutaneous	2	Low	No	One wash	One wash	94.42	54.75		2.07	1.88		1.48	1.21
M100	Gribbles-Clayton	1	Cutaneous	2	Low	No	One wash	One wash	115.9	53.57		2.04	1.89		2.03	1.48
M101	Gribbles-Clayton	1	Cutaneous	2	Low	No	One wash	One wash	40.87	48.51		2.09	1.59		1.36	0.74
M102	Gribbles-Clayton	1	Subcutaneous	NA	NA	No	Two washes	Two washes	79.6	62.77	17.51	2.1	1.69	2.6	1.74	0.94	1.12
M103	Gribbles-Clayton	1	Cutaneous	2	Low	No	Two washes	None	142.16	162.69	44.71	1.94	1.7	2.05	2.1	1.05	1.63
M104	Gribbles-Clayton	1	Cutaneous	2	Low	No	Two washes	Two washes	80.32	75.68	17.32	2.07	1.68	2.55	2.18	0.94	1.48
M105	Gribbles-Clayton	1	Cutaneous	2	Low	No	None	None	23.6			2.07			1.57
M106	Gribbles-Clayton	1	Cutaneous	2	Low	No	Two washes	Two washes	74.5	55.74	63.59	2.07	1.74	1.57	1.65	0.98	0.71
M107	Gribbles-Clayton	1	Cutaneous	2	Low	No	Two washes	Two washes	94.08	62.08	14.79	1.91	1.7	3.05	1.78	1.11	1.61
M108	Gribbles-Clayton	1	Cutaneous	3	High	Exon 11 ITD	Two washes	Two washes	148.67	159.7	33.05	1.95	1.66	2.01	2.17	0.94	2.01
M109	Gribbles-Clayton	1	Subcutaneous	NA	NA	No	Two washes	Two washes	61.27	57.24	12.82	1.93	1.65	2.21	1.43	0.88	1.37
M110	Gribbles-Clayton	1	Cutaneous	3	High	No	One wash	One wash	98.35	82.11		2	1.63		2.25	0.82
M111	Gribbles-Clayton	1	Cutaneous	2	Low	No	One wash	None	83.33	76.93		1.82	1.68		1.9	1.08
M112	Gribbles-Clayton	1	Cutaneous	2	Low	No	Two washes	None	261.68	247.87	65.77	1.89	1.73	1.93	2.02	1.11	2.03
M113	Gribbles-Clayton	1	Cutaneous	2	Low	No	One wash	One wash	91.99	76.64		2	1.61		1.31	0.73
M114	Gribbles-Clayton	1	Cutaneous	2	High	No	One wash	One wash	294.71	187.31		1.92	1.65		2.09	0.86
M115	Gribbles-Clayton	1	Cutaneous	2	Low	No	One wash	One wash	50.08	84.72		1.83	1.58		1.65	0.68
M116	Gribbles-Clayton	1	Subcutaneous	NA	NA	No	One wash	One wash	38.09	46.42		1.77	1.53		1.38	0.64
M117	Gribbles-Clayton	1	Subcutaneous	NA	NA	No	Two washes	Two washes	165.69	149.78	15.96	1.97	1.62	2.46	2.04	0.76	1.45
M118	Gribbles-Clayton	1	Cutaneous	2	Low	No	One wash	One wash	29.75	27.31		1.66	1.55		1.03	0.69
M119	Gribbles-Clayton	1	Cutaneous	2	Low	No	None	None	41.05			1.92			2.16
M120	Gribbles-Clayton	1	Cutaneous	2	Low	No	None	None	14.65			1.9			1.12
M121	Gribbles-Clayton	1	Cutaneous	1	Low	No	None	None	11.31			2.33			1.24
M122	Gribbles-Clayton	1	Cutaneous	3	High	No	One wash	One wash	115.34	81.16		1.95	1.59		2.12	0.81
M123	Gribbles-Clayton	1	Cutaneous	1	Low	No	None	None	13.67			1.54			2.03
M124	Gribbles-Clayton	1	Cutaneous	2	Low	No	One wash	One wash	73.65	16.24		1.91	1.87		1.65	0.17
M125	Gribbles-Clayton	1	Subcutaneous	NA	NA	No	One wash	None	48.95	118.49		1.94	1.54		1.52	0.67
M126	Gribbles-Clayton	1	Cutaneous	2	Low	No	Two washes	Two washes	164.7	97.76	21.03	1.93	1.72	2.32	1.93	1	1.93
M127	Gribbles-Clayton	1	Cutaneous	3	High	Exon 11 ITD	Two washes	Two washes	120.88	49.69	26.25	1.84	1.84	1.75	2.08	1.63	1.09
M128	Gribbles-Clayton	1	Cutaneous	2	Low	No	Two washes	Two washes	68.02	43.83	15.43	1.86	1.83	1.75	1.81	0.99	0.97
M129	Gribbles-Clayton	1	Cutaneous	3	High	No	One wash	None	109.68	61.93		1.86	1.69		1.85	0.9
M130	Gribbles-Clayton	1	Cutaneous	3	High	No	None	None	58.6			1.98			1.97
M131	Gribbles-Clayton	1	Cutaneous	2	Low	No	None	None	19.5			2.03			1.37
M132	Gribbles-Clayton	1	Cutaneous	2	Low	No	One wash	One wash	42.19	16.94		2.03	1.85		1.91	1.03
M133	Gribbles-Clayton	1	Cutaneous	2	Low	No	None	None	38.43			2.13			1.29
M134	Gribbles-Clayton	1	Cutaneous	2	Low	No	None	None	34.58			2.14			1.1
M135	Gribbles-Clayton	1	Subcutaneous	NA	NA	No	Two washes	None	156.36	47.33	3.52	1.92	1.92	1.75	1.91	2.13	2.5
M136	Gribbles-Clayton	1	Cutaneous	3	High	No	None	None	293.27			1.98			2.12
M137	Gribbles-Clayton	1	Cutaneous	2	Low	No	One wash	None	54.25	36.76		1.84	1.59		2.26	0.74
M138	Gribbles-Clayton	1	Cutaneous	2	Low	No	One wash	One wash	202.46	89.05		1.92	1.78		1.77	1.19
M139	Gribbles-Clayton	1	Cutaneous	2	Low	No	One wash	One wash	61.84	35		1.94	1.81		2.19	0.12
M140	Gribbles-Clayton	1	Cutaneous	3	High	No	None	None	46.73			1.94			1.82
M141	Gribbles-Clayton	1	Cutaneous	3	High	No	None	None	193.44			1.95			2.21
M142	Gribbles-Clayton	1	Cutaneous	2	Low	No	None	None	14.58			2.32			0.89
M143	Gribbles-Clayton	1	Subcutaneous	NA	NA	No	One wash	None	67.92	31.5		1.89	1.74		2.14	1.15
M144	Gribbles-Clayton	1	Subcutaneous	NA	NA	No	None	None	105			1.95			1.86
M146	Gribbles-Clayton	1	Cutaneous	2	High	No	One wash	None	229.66	89.2		1.89	1.76		2.15	1.17
M147	Gribbles-Clayton	1	Cutaneous	2	Low	No	One wash	None	42.21	12.15		1.93	2.08		1.4	2.01
M148	Gribbles-Clayton	1	Cutaneous	2	Low	No	None	None	10.86			2.2			0.61
M149	Gribbles-Clayton	1	Cutaneous	2	Low	No	One wash	One wash	140.35	90.86		1.97	1.71		1.64	0.92
M150	Gribbles-Clayton	1	Cutaneous	2	Low	No	One wash	None	10.97	66.32		1.3	1.59		1.27	0.67
M151	Gribbles-Clayton	1	Cutaneous	3	High	Exon 11 ITD	None	None	119.95			2.02			2.2
M152	Gribbles-Clayton	1	Cutaneous	2	Low	No	None	None	36.53			1.98			2.43
M153	Gribbles-Clayton	1	Cutaneous	2	Low	No	One wash	None	26.04	37.35		1.94	1.68		2.31	0.66
M154	Gribbles-Clayton	1	Subcutaneous	NA	NA	No	One wash	One wash	35.1	30.7		1.78	1.6		0.79	0.63
M155	Gribbles-Clayton	1	Cutaneous	3	High	No	One wash	One wash	125.09	90.59		1.93	1.7		1.99	0.89
M156	Gribbles-Clayton	1	Cutaneous	2	Low	No	One wash	One wash	87.72	25.52		2.02	1.92		2.11	0.96
M157	Gribbles-Clayton	1	Cutaneous	2	Low	No	One wash	One wash	104.43	80.91		2.01	1.64		2.16	0.81
M159	Gribbles-Clayton	1	Cutaneous	2	Low	No	One wash	One wash	54.59	34.3		1.98	1.73		1.74	0.91
M160	Gribbles-Clayton	1	Cutaneous	2	Low	No	None	None	42.58			2.08			2.24
M161	Gribbles-Clayton	1	Cutaneous	2	Low	No	One wash	One wash	57.87	46.53		2.18	1.68		0.89	0.84
M162	Gribbles-Clayton	1	Cutaneous	2	Low	No	One wash	One wash	29.98	22.69		2.11	1.62		1.27	0.75
M163	Gribbles-Clayton	1	Cutaneous	2	Low	No	One wash	One wash	22.51	3.26		1.94	2.52		1.02	2.01
M164	Gribbles-Clayton	1	Cutaneous	3	High	No	None	None	75.3			2.1			1.66
M165	Gribbles-Clayton	1	Cutaneous	2	Low	No	None	None	50.29			2.07			2.13
M166	Gribbles-Clayton	1	Cutaneous	2	Low	No	One wash	None	42.21	31.95		1.97	1.62		1.24	0.72
M167	Gribbles-Clayton	1	Cutaneous	2	Low	No	One wash	One wash	80.17	44.95		1.98	1.93		2.08	1.82
M168	Gribbles-Clayton	1	Subcutaneous	NA	NA	No	One wash	One wash	90.62	58.95		1.95	1.73		1.57	1.01
M169	Gribbles-Clayton	1	Cutaneous	3	High	Exon 11 ITD	None	None	86.62			2.03			2.4
M170	Gribbles-Clayton	1	Cutaneous	2	High	No	One wash	One wash	358.95	139.31		1.97	1.94		2.24	1.82
M171	Gribbles-Clayton	1	Cutaneous	3	High	No	None	None	353.12			1.97			2.25
M172	Gribbles-Clayton	1	Subcutaneous	NA	NA	No	One wash	One wash	65.37	44.67		1.98	1.71		1.93	0.93
M174	Gribbles-Clayton	1	Cutaneous	2	Low	No	One wash	One wash	31.37	77.91		1.99	1.48		1.04	0.67
M175	Gribbles-Clayton	1	Cutaneous	1	Low	No	None	None	11.92			1.73			1.98
M176	Gribbles-Clayton	1	Cutaneous	1	Low	No	One wash	None	22.14	6.58		1.84	1.94		2.01	1.88
M177	Gribbles-Clayton	1	Cutaneous	1	Low	No	One wash	One wash	11.28	56.7		2.16	1.53		0.41	0.64
M178	Gribbles-Clayton	1	Cutaneous	2	Low	No	One wash	None	50.99	88.19		2.14	1.57		0.79	0.75
M179	Gribbles-Clayton	1	Subcutaneous	NA	NA	No	One wash	One wash	21.42	138.08		2.28	1.55		0.44	0.64
M180	Gribbles-Clayton	1	Cutaneous	2	Low	No	One wash	None	9.39	81.33		2.15	1.53		0.37	0.62
M181	Gribbles-Clayton	1	Cutaneous	3	High	No	One wash	One wash	553.23	141.72		2.01	1.94		1.93	1.72
M182	Gribbles-Clayton	1	Cutaneous	2	Low	No	One wash	One wash	100.51	45.21		2.03	1.87		1.15	1.3
M183	Gribbles-Clayton	1	Cutaneous	2	Low	No	One wash	One wash	63.46	122.34		2.03	1.55		1.14	0.69
M184	Gribbles-Clayton	1	Cutaneous	3	High	No	None	None	53.65			2.05			0.57
M185	Gribbles-Clayton	1	Cutaneous	2	Low	No	One wash	One wash	147.95	97.38		1.96	1.71		1.72	2.3
M186	Gribbles-Clayton	1	Cutaneous	2	Low	No	One wash	One wash	76.22	46.01		1.98	1.65		1.23	0.8
U2	University of Adelaide	4	Cutaneous	2	Low	No	None	None	151			1.75			1.92
U4	University of Adelaide	4	Cutaneous	3	High	Exon 11 ITD	None	None	330.12			1.98			2.22
U7	University of Adelaide	4	Cutaneous	2	Low	No	None	None	3.52			1.42			2.9
U9	University of Adelaide	4	Cutaneous	2	Low	No	None	None	96.32			1.91			1.72
U10	University of Adelaide	4	Cutaneous	2	Low	No	None	None	4.66			1.38			2.11
U12	University of Adelaide	4	Cutaneous	2	Low	No	None	None	13.11			1.84			2.94
U25	University of Adelaide	3	Cutaneous	2	Low	No	None	None	55.9			1.8			1.87
U30	University of Adelaide	3	Cutaneous	2	Low	No	None	None	76.78			1.94			1.9
U46	University of Adelaide	3	Subcutaneous	NA	NA	No	Two washes	Two washes	50.15	27.27	5.77	1.3	1.39	2.38	1.11	0.63	2.38
U47	University of Adelaide	3	Cutaneous	2	Low	No	Two washes	Two washes	83.38	53.62	43.77	2.05	1.71	1.75	2.05	1.09	1.75
U48	University of Adelaide	3	Cutaneous	3	High	No	None	None	80.11			2.06			2.06
U49	University of Adelaide	3	Cutaneous	2	Low	No	Two washes	None	36.39	16.63	63.93	2.14	2	1.56	2.14	1.06	1.56
U50	University of Adelaide	1	Subcutaneous	NA	NA	No	None	None	3.55			1.23			0.28
U51	University of Adelaide	0	Subcutaneous	NA	NA	No	None	None	4.82			1.23			0.49
U54	University of Adelaide	0	Cutaneous	2	Low	No	One wash	None	16.93	5.31		2.04	1.91		1.37	1.67
U55	University of Adelaide	0	Cutaneous	2	Low	No	One wash	One wash	15.04	3.05		2.17	1.66		2.22	2.56
